# Supplementary material
Source: PubMed Central journal article supplement (PMC2930422)
Supplement: 1008522107_pnas.201008522SI.pdf [file 1008522107_pnas.201008522SI.pdf]

# Supporting Information

Lee et al. 10.1073/pnas.1008522107

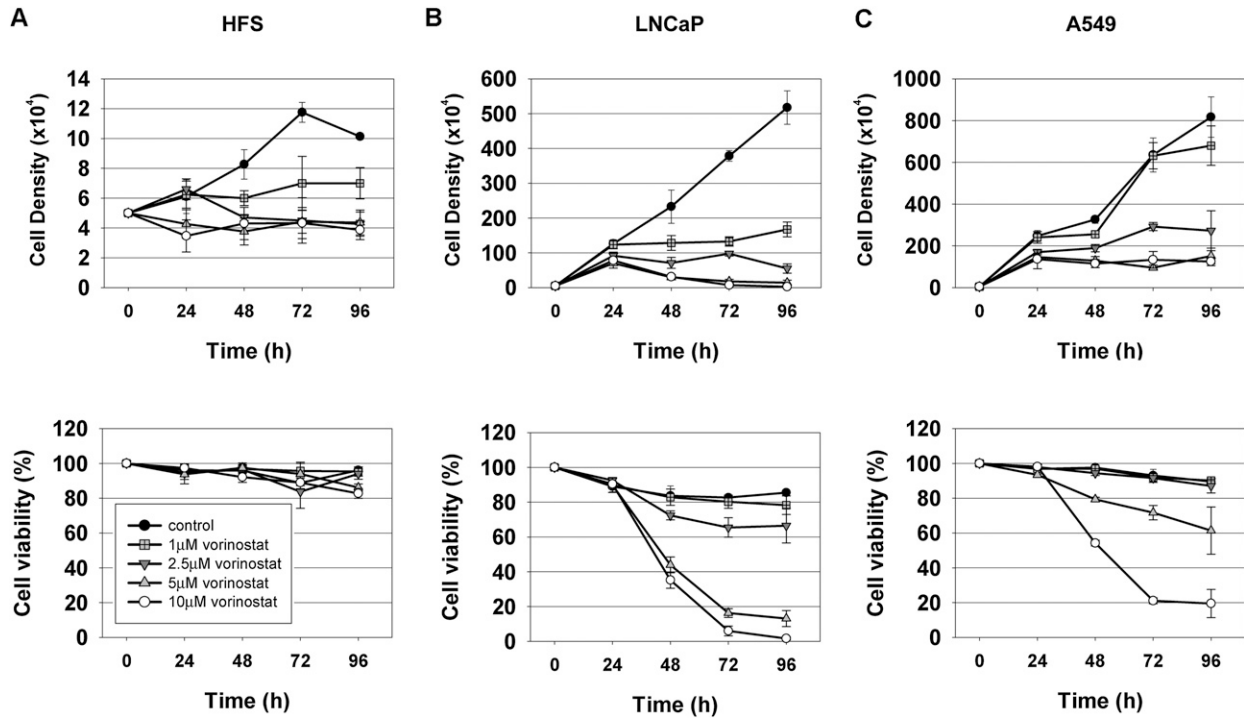

**Fig. S1.** Effect of vorinostat on cell growth and viability. Cell density (*Upper*) and viability (*Lower*) of (A) HFS (normal human foreskin fibroblast), (B) LNCaP (human prostate cancer), and (C) A549 (human lung adenocarcinoma) cells cultured with vorinostat at concentrations indicated for 96 h.
